# Supplementary material for: Kinetics of Intestinal Presence of Spores Following Oral Administration of Bacillus clausii Formulations: Three Single-Centre, Crossover, Randomised, Open-Label Studies
Source: PubMed Central journal article supplement — Eur J Drug Metab Pharmacokinet. 2021 Mar 8;46(3):375–84. doi: 10.1007/s13318-021-00676-2 (PMC8093150; doi:10.1007/s13318-021-00676-2), 2021-03-08
Supplement: 13318_2021_676_MOESM1_ESM.pdf [file 13318_2021_676_MOESM1_ESM.pdf]

**Kinetics of intestinal presence of spores following oral administration of Bacillus clausii formulations:**

**Three single centre, crossover, randomised, open label studies**

**Pierluigi Navarra,<sup>1</sup> Stefano Milleri,<sup>2</sup> Marcos III Perez,<sup>3</sup> Maria Chiara Uboldi,<sup>4</sup> Paolo Pellegrino,<sup>4</sup> Beatrice Bois De Fer,<sup>5</sup> Lorenzo Morelli<sup>6</sup>**

*<sup>1</sup> Section of Pharmacology, Department of Healthcare surveillance and Bioethics, Catholic University Medical School, Catholic University of the Sacred Heart, Milan, Italy; <sup>2</sup> Centro Ricerche Cliniche di Verona, Verona, Italy; <sup>3</sup> Global Medical, Consumer Healthcare, Sanofi-Aventis Deutschland GmbH, Frankfurt, Germany; <sup>4</sup> CHC Medical Department, Sanofi, Italy ; <sup>5</sup> Sanofi Consumer Health Care- Analytical & Scientific Platforms, Sanofi Clinical Sciences and Operations, Paris, France; <sup>6</sup> DiSTAS, Università Cattolica del Sacro Cuore, Piacenza, Cremona, Italy.*

**Corresponding author:** Maria Chiara Uboldi. Sanofi. Viale Luigi Bodio 37/b, 20158 Milan, Italy

**E-mail:** MariaChiara.Uboldi@sanofi.com

**Short title:** Kinetics of Bacillus clausii formulations over three studies

## **Supplementary Information**

**Table S1. Treatment emergent adverse events by system organ class and preferred term.**

**Table S2. Spore counts (in millions). Standard deviation within data and coefficient of variation of the three studies.**

**Table S1. Treatment emergent adverse events by system organ class and preferred term.**

|                                                             | <b>2012 EGKINETIC4</b> |                |
|-------------------------------------------------------------|------------------------|----------------|
|                                                             | <b>E2 BID</b>          | <b>E4 OD</b>   |
|                                                             | <b>N=22</b>            | <b>N=22</b>    |
|                                                             | <b>N (%)</b>           | <b>N (%)</b>   |
| <b>Gastrointestinal disorders</b>                           |                        |                |
| Abdominal pain                                              | 3 (13.6 %)             | 3 (13.6 %)     |
| <b>Infections and infestations</b>                          |                        |                |
| Dysentery                                                   | 1 (4.5 %)              | 1 (4.5 %)      |
| Foot and mouth disease                                      | 1 (4.5 %)              | 0              |
| Nasopharyngitis                                             | 1 (4.5 %)              | 1 (4.5 %)      |
| <b>Injury, poisoning and procedural complications</b>       |                        |                |
| Arthropod sting                                             | 1 (4.5 %)              | 1 (4.5 %)      |
| <b>Nervous system disorders</b>                             |                        |                |
| Headache                                                    | 1 (4.5 %)              | 1 (4.5 %)      |
| <b>Reproductive system and breast disorders</b>             |                        |                |
| Menstrual discomfort                                        | 1 (4.5 %)              | 2 (9.1 %)      |
| Prostatitis                                                 | 1 (4.5 %)              | 1 (4.5 %)      |
| <b>Respiratory, thoracic and mediastinal disorders</b>      |                        |                |
| Oropharyngeal pain                                          | 1 (4.5 %)              | 1 (4.5 %)      |
|                                                             | <b>2012 EGKINETIC6</b> |                |
|                                                             | <b>EC 2 TID</b>        | <b>ES 6 OD</b> |
|                                                             | <b>N=22</b>            | <b>N=22</b>    |
|                                                             | <b>N (%)</b>           | <b>N (%)</b>   |
| <b>Endocrine disorders</b>                                  |                        |                |
| Goitre                                                      | 1 (4.5 %)              | 0              |
| <b>Gastrointestinal disorders</b>                           |                        |                |
| Abdominal pain                                              | 1 (4.5 %)              | 1 (4.5 %)      |
| <b>General disorders and administration site conditions</b> |                        |                |
| Pain                                                        | 2 (9.1 %)              | 1 (4.5 %)      |
| <b>Metabolism and nutrition disorders</b>                   |                        |                |
| Hypertriglyceridaemia                                       | 1 (4.5 %)              | 0              |
| <b>Nervous system disorders</b>                             |                        |                |
| Headache                                                    | 2 (9.1 %)              | 3 (13.6 %)     |
| <b>Reproductive system and breast disorders</b>             |                        |                |
| Menstrual discomfort                                        | 1 (4.5 %)              | 1 (4.5 %)      |
| <b>Respiratory, thoracic and mediastinal disorders</b>      |                        |                |
| Nasopharyngitis                                             | 0                      | 3 (13.6 %)     |
| Oropharyngeal pain                                          | 0                      | 1 (4.5 %)      |
|                                                             | <b>EGKINETIC 6OP</b>   |                |
|                                                             | <b>ES6 OD</b>          | <b>E6 OD</b>   |
|                                                             | <b>N=30</b>            | <b>N=29</b>    |
|                                                             | <b>N (%)</b>           | <b>N (%)</b>   |
| <b>Gastrointestinal disorders</b>                           |                        |                |
| Toothache                                                   | 0                      | 1 (3.4%)       |
| <b>Infections and infestations</b>                          |                        |                |
| Influenza                                                   | 0                      | 1 (3.4%)       |
| <b>Nervous system disorders</b>                             |                        |                |
| Headache                                                    | 1 (3.3%)               | 3 (10.3%)      |

**Table S2. Spore counts (in millions). Standard deviation within data and coefficient of variation of the three studies.**

|                                       | <b>Formulation</b> | <b>SD within</b> | <b>Coefficient of variation (%)</b> |
|---------------------------------------|--------------------|------------------|-------------------------------------|
| <b>Summary AUC, spore counts</b>      |                    |                  |                                     |
| <b>2012 EGKINETIC4</b>                | E2 BID vs E4<br>OD | 0.21             | 21.15                               |
| <b>2012 EGKINETIC6</b>                | E2 TID vs E6<br>OD | 0.57             | 61.60                               |
| <b>2016 EGKINETIC6OP</b>              | E6 OD vs ES6<br>OD | 0.37             | 38.70                               |
| <b>Summary AUC, vegetative counts</b> |                    |                  |                                     |
| <b>2012 EGKINETIC4</b>                | E2 BID vs E4<br>OD | 0.23             | 23.24                               |
| <b>2012 EGKINETIC6</b>                | E2 TID vs E6<br>OD | 0.57             | 61.92                               |
| <b>Summary AUC, C<sub>max</sub></b>   |                    |                  |                                     |
| <b>2016 EGKINETIC6OP</b>              | E6 OD vs ES6<br>OD | 0.34             | 35.1                                |
